# Supplementary material
Source: publisher site journal article supplement (https://www.spandidos-publications.com/4023/downloadSupplementary)
Supplement: Supplementary file 1 [file downloadSupplementary]

Table SI. Clinicopathological characteristics of the patients with gastric cancer.

| Characteristic         | Number of patients |
|------------------------|--------------------|
| Age, years             |                    |
| ≤60                    | 7                  |
| >60                    | 23                 |
| Sex                    |                    |
| Female                 | 12                 |
| Male                   | 18                 |
| Tumor size, cm         |                    |
| ≤2                     | 14                 |
| >2                     | 16                 |
| Tumor differentiation  |                    |
| Well                   | 5                  |
| Poor/moderate          | 25                 |
| TNM stage <sup>a</sup> |                    |
| I-II                   | 12                 |
| III-IV                 | 18                 |
| Lymphatic metastasis   |                    |
| Positive               | 30                 |
| Negative               | 0                  |
| Distant metastasis     |                    |
| Positive               | 24                 |
| Negative               | 6                  |
| HP infection           |                    |
| Positive               | 20                 |
| Negative               | 10                 |

<sup>a</sup>American Joint Committee on Cancer TNM staging for gastric cancer (48). HP, *Helicobacter pylori*; TNM, Tumor-Node-Metastasis.
